# Supplementary material
Source: Springer Nature journal article supplement (https://www.springermedizin.de/resource/supplementary/12887_2013_1254_MOESM3_ESM.pdf/9476054)
Supplement: MOESM3 [file 9476054]

## DISTAL INFLUENCES

### Income & Resources

- ◆ Neighborhood poverty
- ◆ Family poverty
- ◆ Relative deprivation & inequality
- ◆ Access to healthcare

### Social Cohesion

- ◆ Pro-social norms, informal social control
- ◆ Connectedness, social capital
- ◆ Healthy community norms
- ◆ Social exclusion, discrimination

### Physical Environment

- ◆ Decay: abandoned buildings, substandard housing
- ◆ Neighborhood design, land use
- ◆ Access to alcohol, tobacco, other drugs, & firearms
- ◆ Access to nutritious foods
- ◆ Toxic exposures
- ◆ Media

## PROXIMAL INFLUENCES

### Family Influences

- ◆ Involved in learning activities
- ◆ Involved monitoring
- ◆ Non-harsh limit setting
- ◆ Reinforcing interactions
- ◆ Positive role modeling
- ◆ Health maintenance, hygiene
- ◆ Involvement in positive activities
- ◆ Cumulative family risk

### School Influences

- ◆ High-quality early childhood education
- ◆ Quality education
- ◆ Positive school climate
- ◆ School attendance
- ◆ Health education & prevention
- ◆ After-school education & activities

### Peer Influences

- ◆ Pro-social peers, role models
- ◆ Exposure to alcohol, tobacco, other drug use, violence & crime
- ◆ Social networking technology

## PRIMARY OUTCOMES

### Cognitive Development

- ◆ Language development
- ◆ Reading & math proficiency
- ◆ Intellectual development

### Social/Emotional Competence

- ◆ Attachment
- ◆ Self-regulation
- ◆ Moral development

### Absence of Psychological & Behavioral Problems

- ◆ Attention & hyperactivity difficulties
- ◆ Aggressive & violent behavior
- ◆ Depression & anxiety symptoms
- ◆ Drug use, risky sexual behavior

### Physical Health

- ◆ Birth weight
- ◆ Height/weight percentiles
- ◆ Diet, physical activity, obesity
- ◆ Injuries, STDs, type 2 diabetes
